# Supplementary material for: The one-step synthesis of B,N co-doped carbon dots as a fracturing crosslinker and fluorescent tracer in flowback fluid and their performance
Source: Royal Society of Chemistry journal article supplement (doi:10.1039/d1nj04236j), 2021-01-01
Supplement: d1nj04236j1.pdf [file d1nj04236j1.pdf]

Table S1. Viscosity and hanging properties of fracturing fluid with different amount  
of guar gum

| Dosage(wt%)          | 0.1 | 0.2 | 0.3      | 0.4   | 0.5   | 0.6   |
|----------------------|-----|-----|----------|-------|-------|-------|
| Properties           |     |     |          |       |       |       |
| Visosity(mPa·s)      | 0.9 | 4.5 | 52.7     | 179.1 | 325.3 | 419.6 |
| Hanging              | ×   | ×   | ×        | √     | √     | √     |
| Liquid surface bulge | ×   | ×   | Slightly | √     | √     | √     |

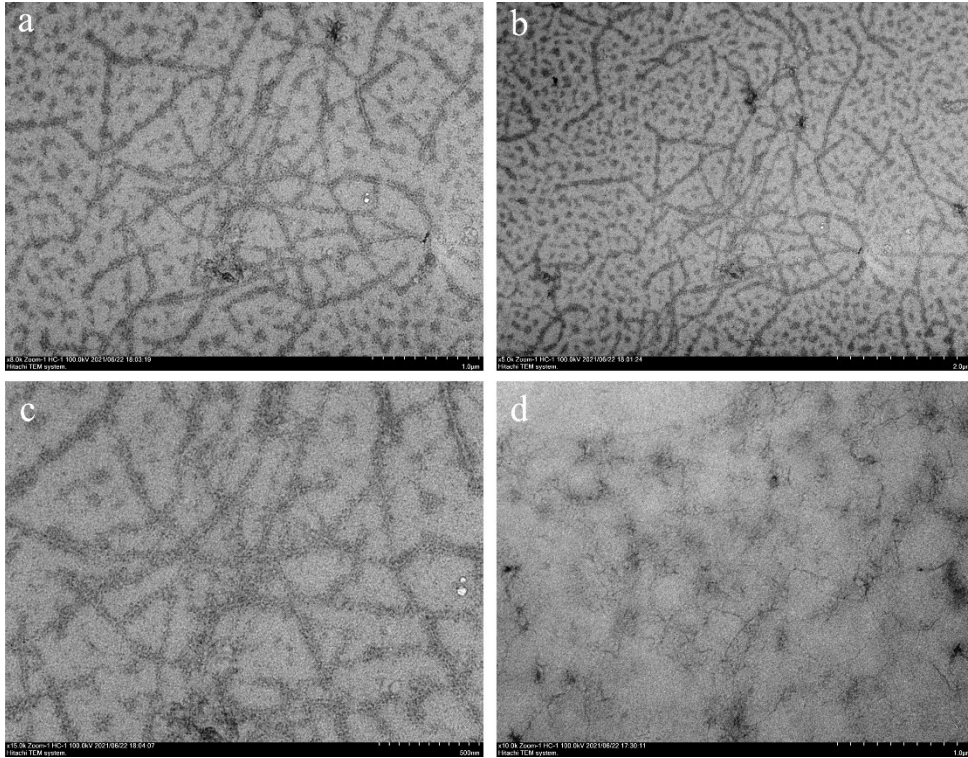

Fig S1. Low-voltage TEM of CDG fracturing fluid
